# Supplementary material for: Association between continuous hyperosmolar therapy and survival in patients with traumatic brain injury – a multicentre prospective cohort study and systematic review
Source: Springer Nature journal article supplement (doi:10.1186/s13054-017-1918-4), 2017-12-01
Supplement: MOESM1 [file 15334398]

**Stage 1 for all comatose brain-injured patients**

Sedation (intravenous)  
Mechanical ventilation to  
    ensure normocapnia  
    prevent hypoxemia  
Body temperature control (36-37°C)  
Normoglycemia

**Intracranial hypertension**

**Not treated with Continuous Hyperosmolar Therapy  
Stage 2**

Boluses of hyperosmolar therapy Mannitol  
    0.25 to 1 mg/kg of body weight  
Or hypertonic saline solution, 250 mOsm dose  
    (blood osmolality < 320 mmol/L)

**Treated with Continuous  
Hyperosmolar Therapy  
Stage 2**

CHT with NaCl20% (1-hr bolus followed  
    by a continuous infusion)  
+/- Boluses of hyperosmolar therapy  
    (blood osmolality < 340 mmol/L)

Continued Stages 1 and 2 as required

**Stage 3 options for the treatment of refractory ICH (if required)**

Barbiturate therapy  
Therapeutic hypothermia (32-35°C)  
Moderate hypocapnia (32-36 mmHg)  
Decompressive Craniectomy
