# Supplementary material for: Association between continuous hyperosmolar therapy and survival in patients with traumatic brain injury – a multicentre prospective cohort study and systematic review
Source: Springer Nature journal article supplement (doi:10.1186/s13054-017-1918-4), 2017-12-01

Figure S3

A.

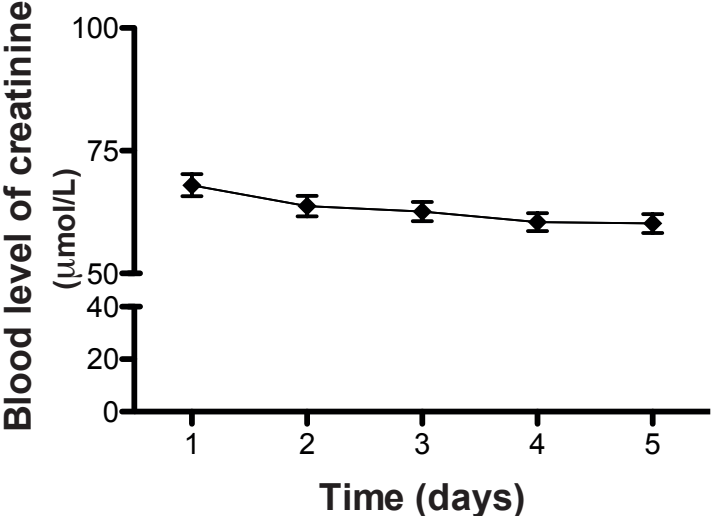

B.

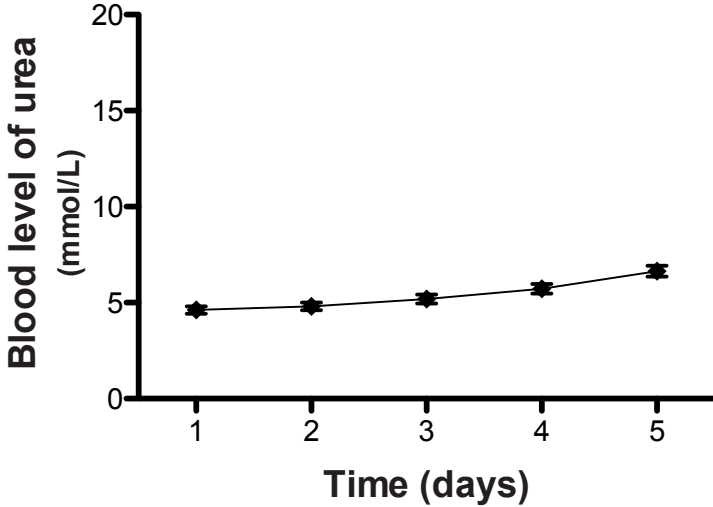

Supplement: MOESM5 [file 15334398]
